# Supplementary material
Source: PubMed Central journal article supplement (PMC10172899)

## Supplementary Figure Legends

**Supplementary Figure S1. Identification of the E3 ligase responsible for N protein degradation upon Hsp90 $\beta$  knockout by western blot.** (A-H) 90 $\beta$ -KO-N-flag stable cells were seeded in 24-well plates for siRNA library screening. At 72 h post-transfection, cells were lysed and analyzed by western blot.

**Supplementary Figure S2. Identification of the E3 ligase responsible for N protein degradation upon Hsp90 $\beta$  knockout by immunofluorescence.** (A-B) HEK293T cells were seeded in 24-well plates, at 72 h post-transfection, cells were transfected with N-GFP plasmid for 48 h and observed by fluorescence microscopy. (C-D) 90 $\beta$ -KO-N-flag stable cells were seeded in 24-well plates. At 84 h post-transfection, cells were immunostained for N (green) and nuclei were stained with DAPI (blue). The cells were observed by fluorescence microscopy.

**Supplementary Figure S3. Infection of Syrian hamsters by SARS-CoV-2 GFP/ $\Delta$ N virus.** (A) A549-ACE2 and Huh7-ACE2 cells were infected with  $10^{8.5}$  PFU of Ad5-N in 100  $\mu$ L for 48 h, then infected with SARS-CoV-2 GFP/ $\Delta$ N virus. Lung tissue from Ad5-N/GFP-transduced hamsters was disrupted by grinding, and lysates were collected for western blot. (B) Ad5-N or Ad5-GFP-transduced hamsters were intranasally inoculated with  $10^{6.5}$  PFU of SARS-CoV-2 GFP/ $\Delta$ N virus in 100  $\mu$ L of PBS. Body weight was monitored daily (n = 6 per group). (C) Left: SARS-CoV-2 Nsp4 mRNA copies per g of lung; right: SARS-CoV-2 M mRNA copies per g of lung were quantified by qRT-PCR. Results present mean and SD of three independent experiments.

S1 Fig A-D

A

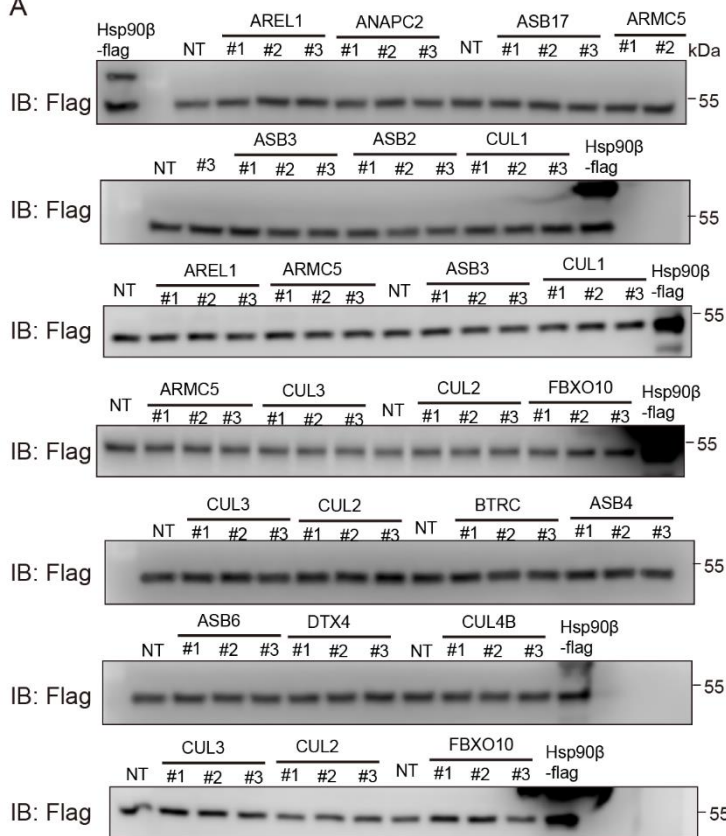

C

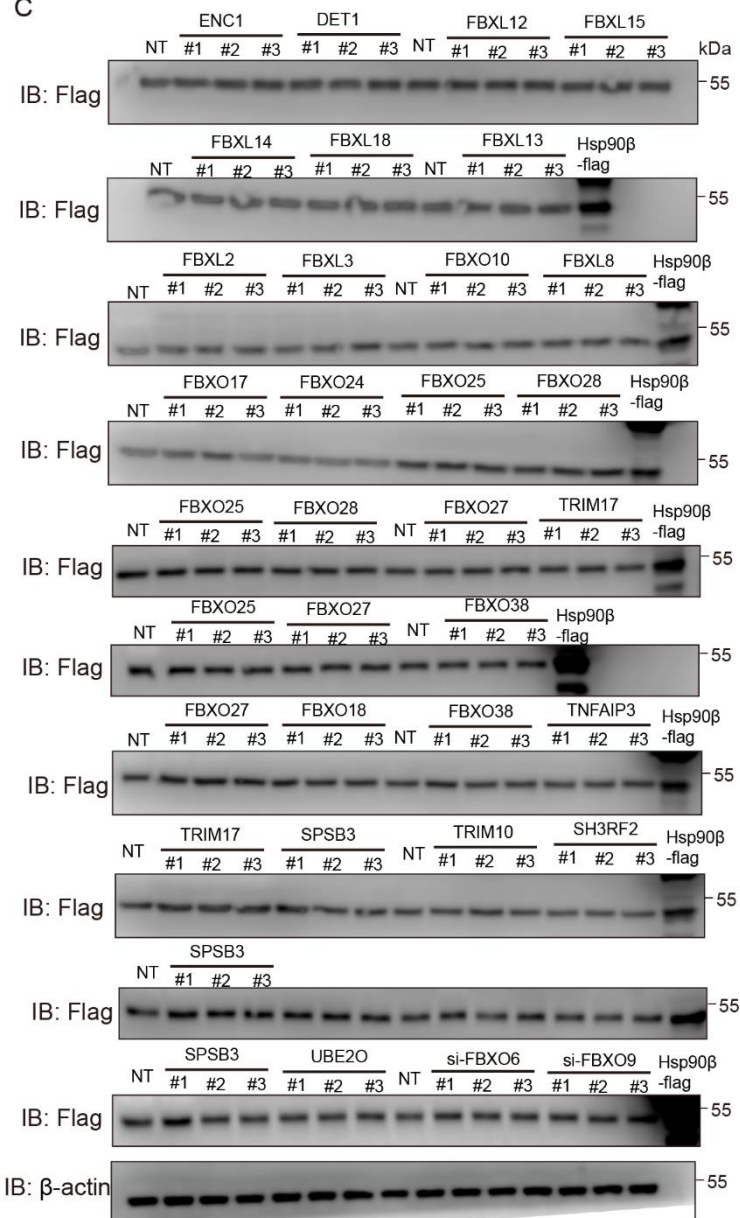

B

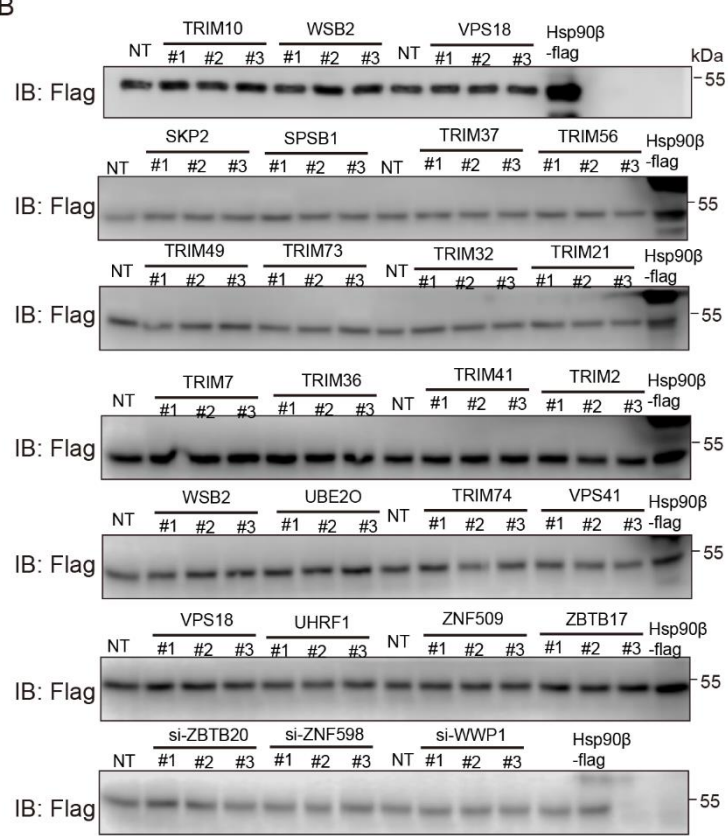

D

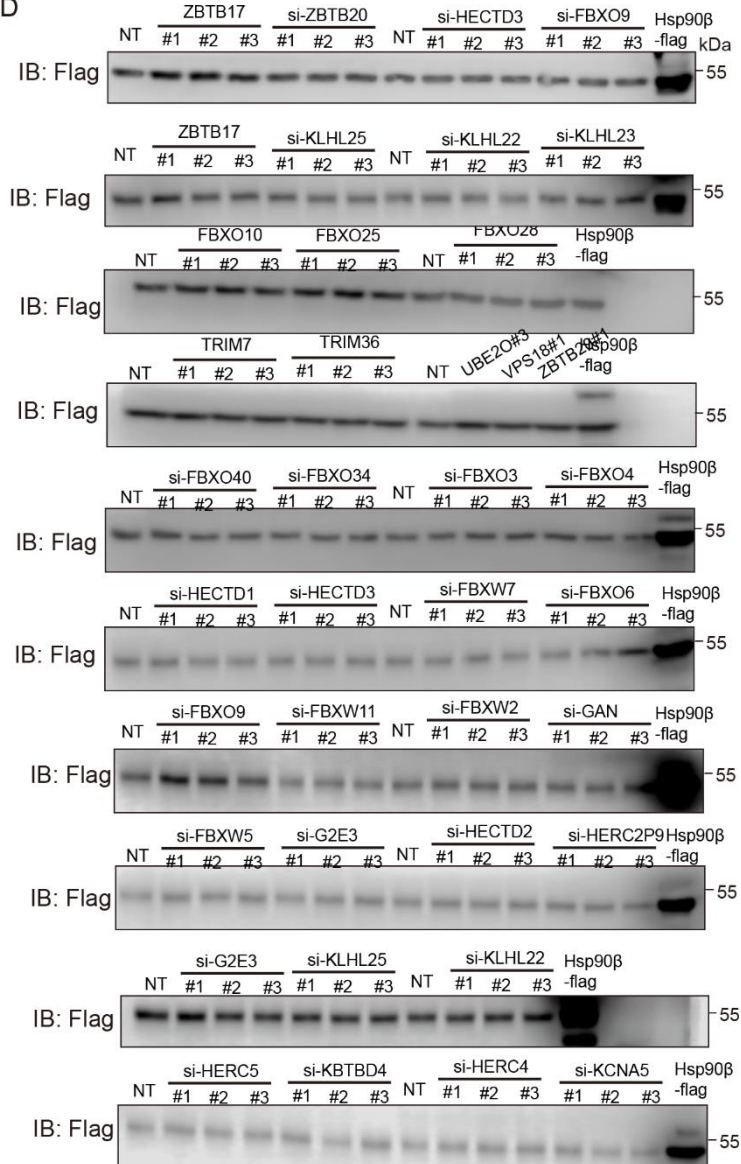

E

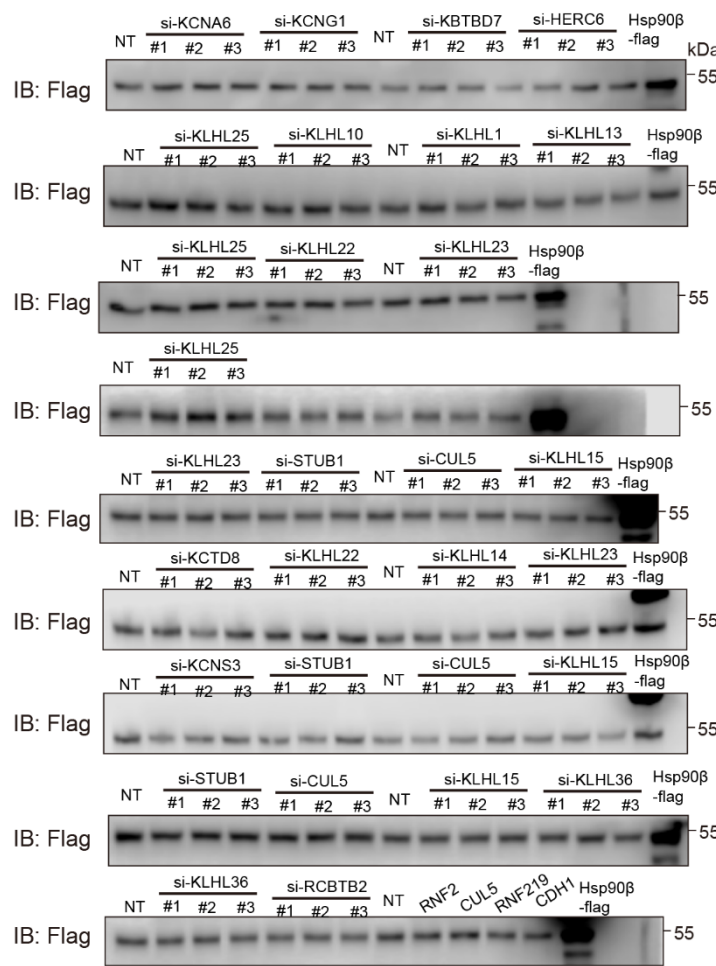

G

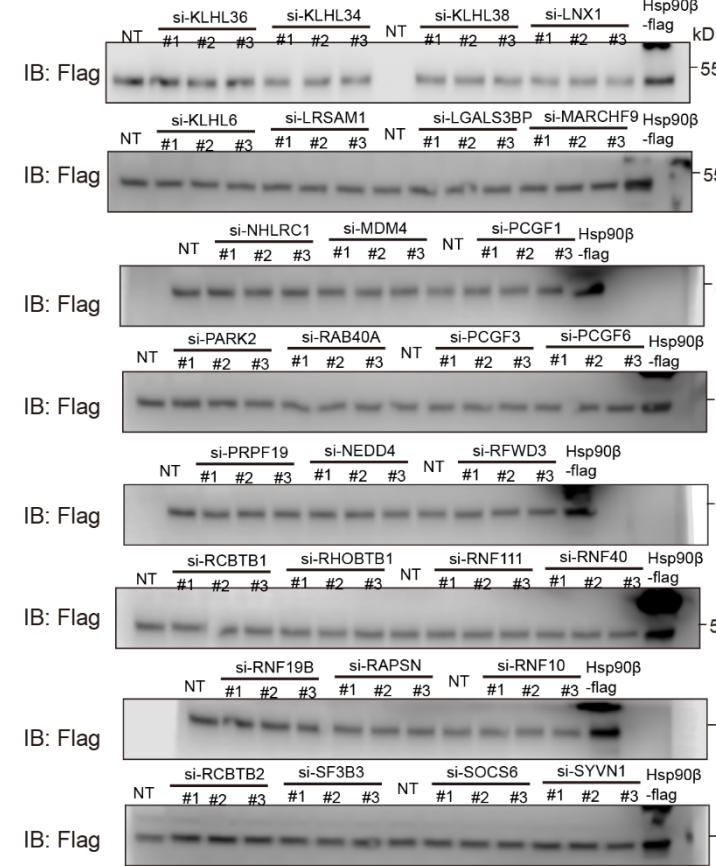

F

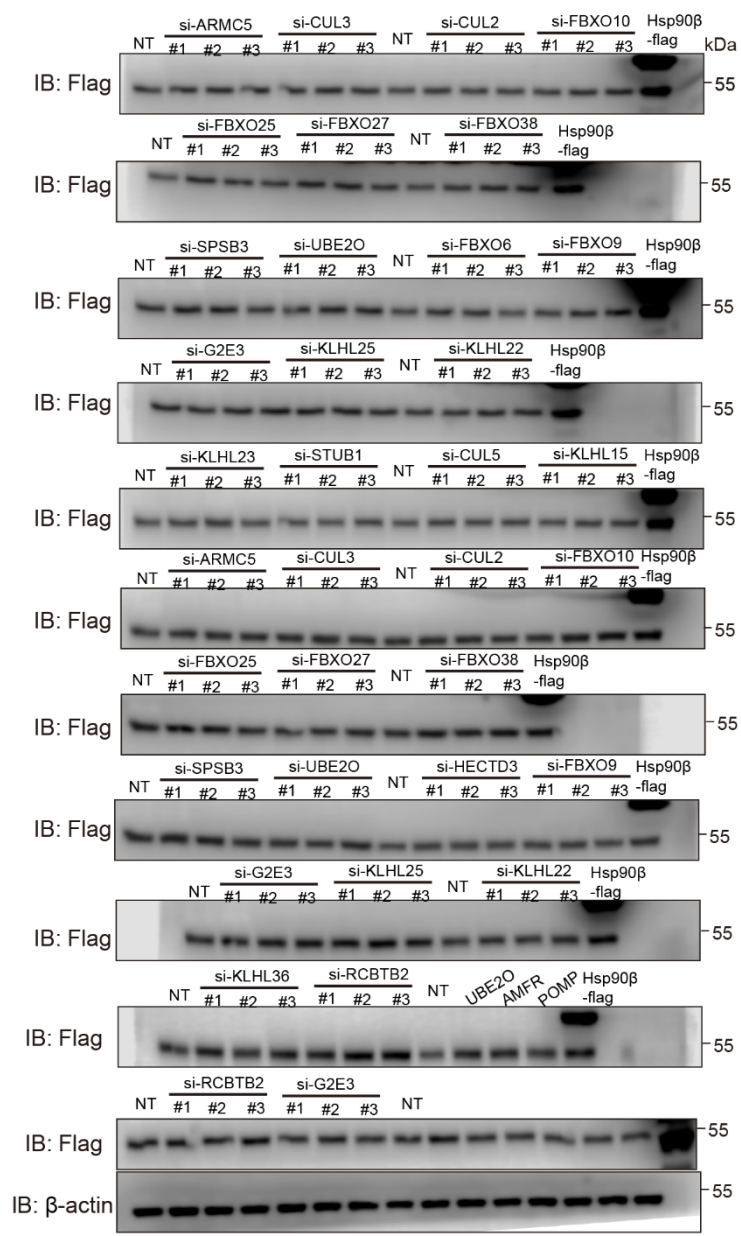

H

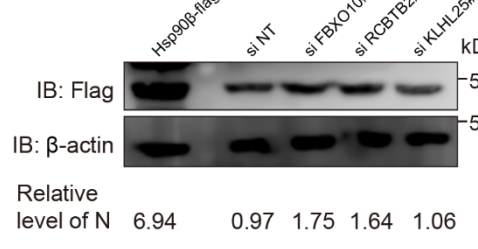

## S2 Fig

A

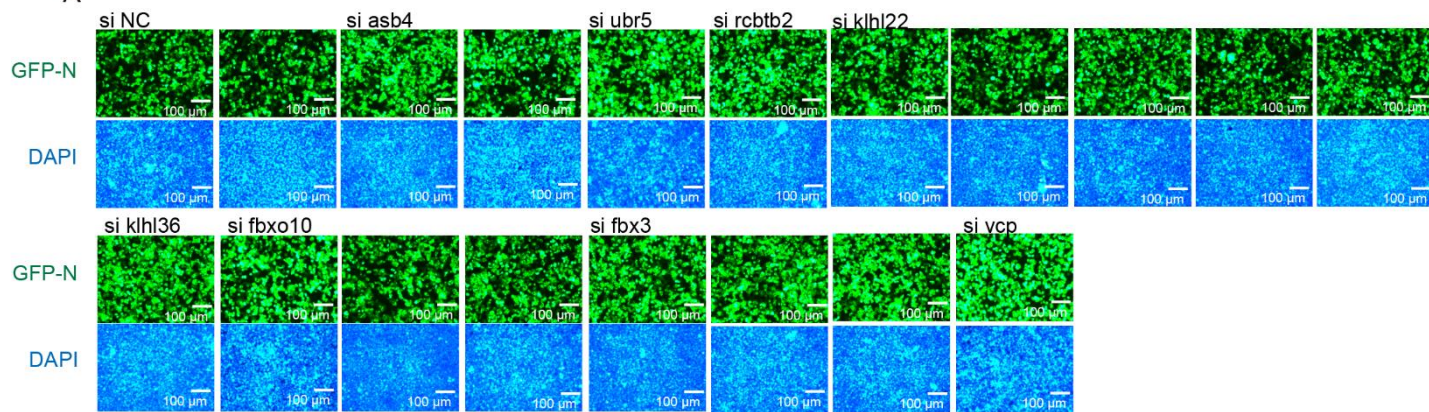

B

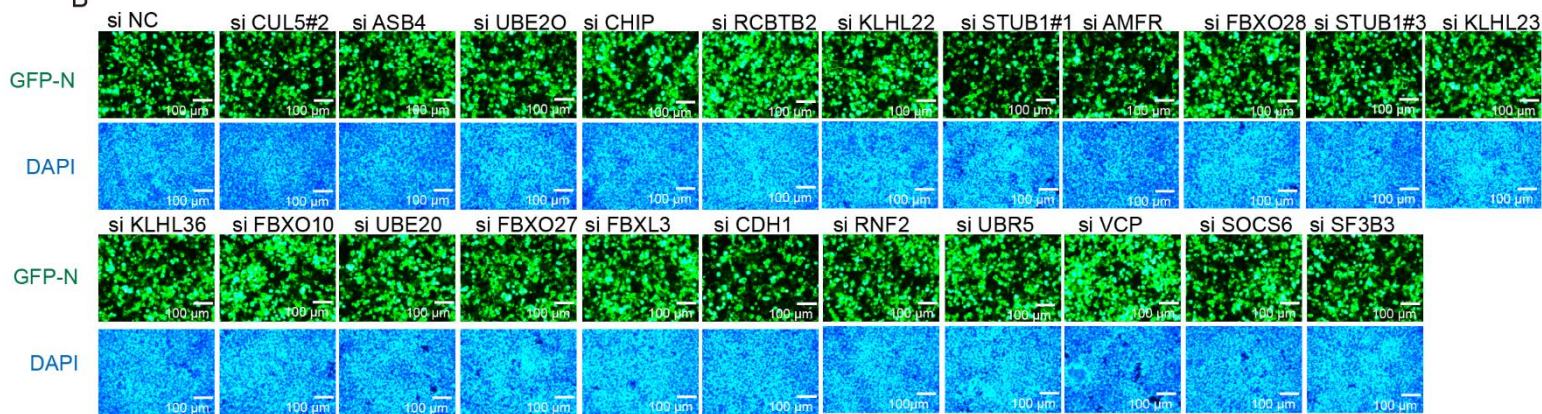

C

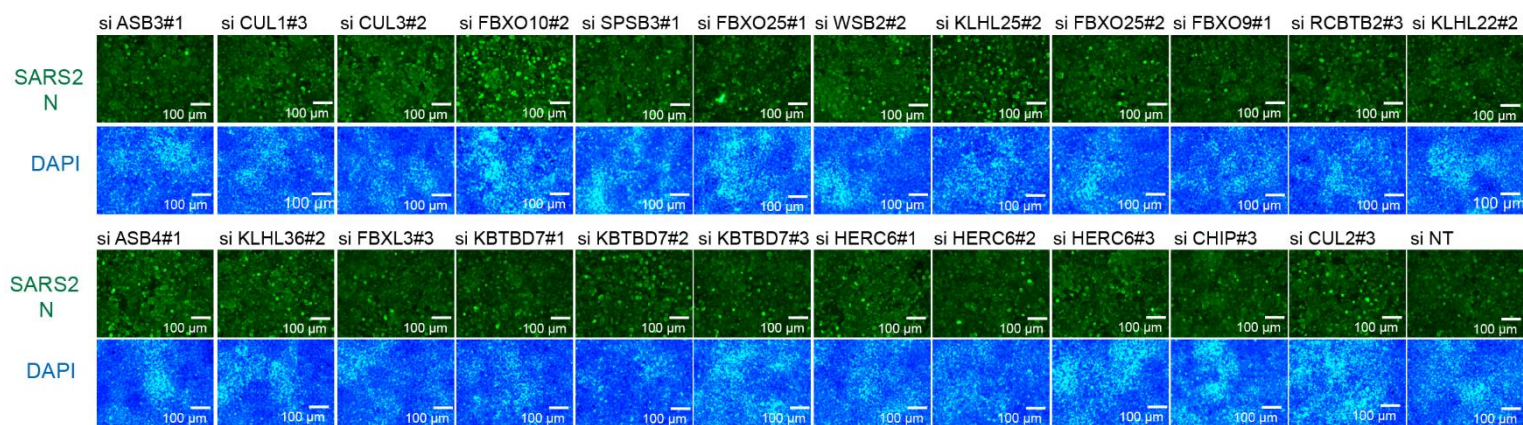

D

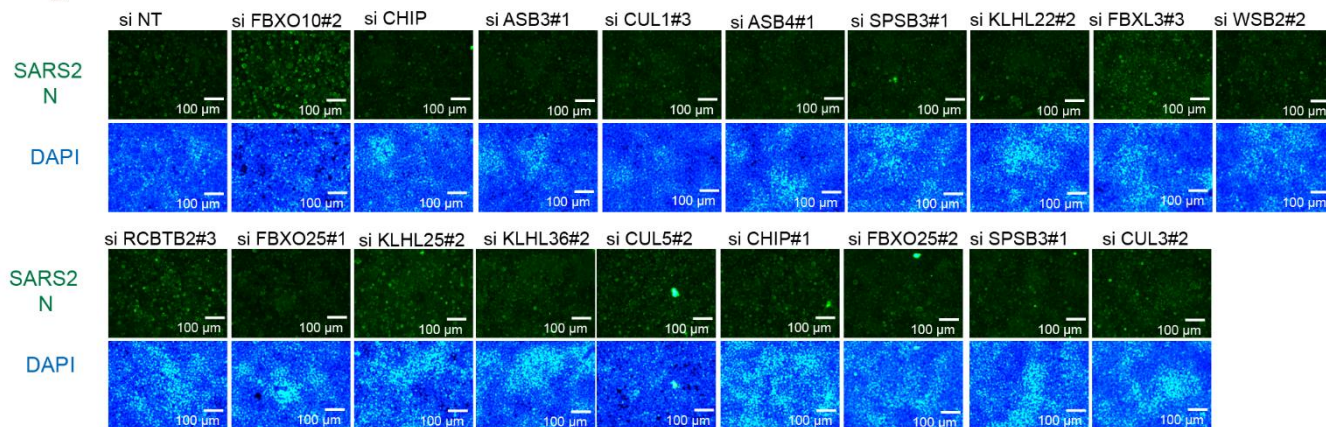

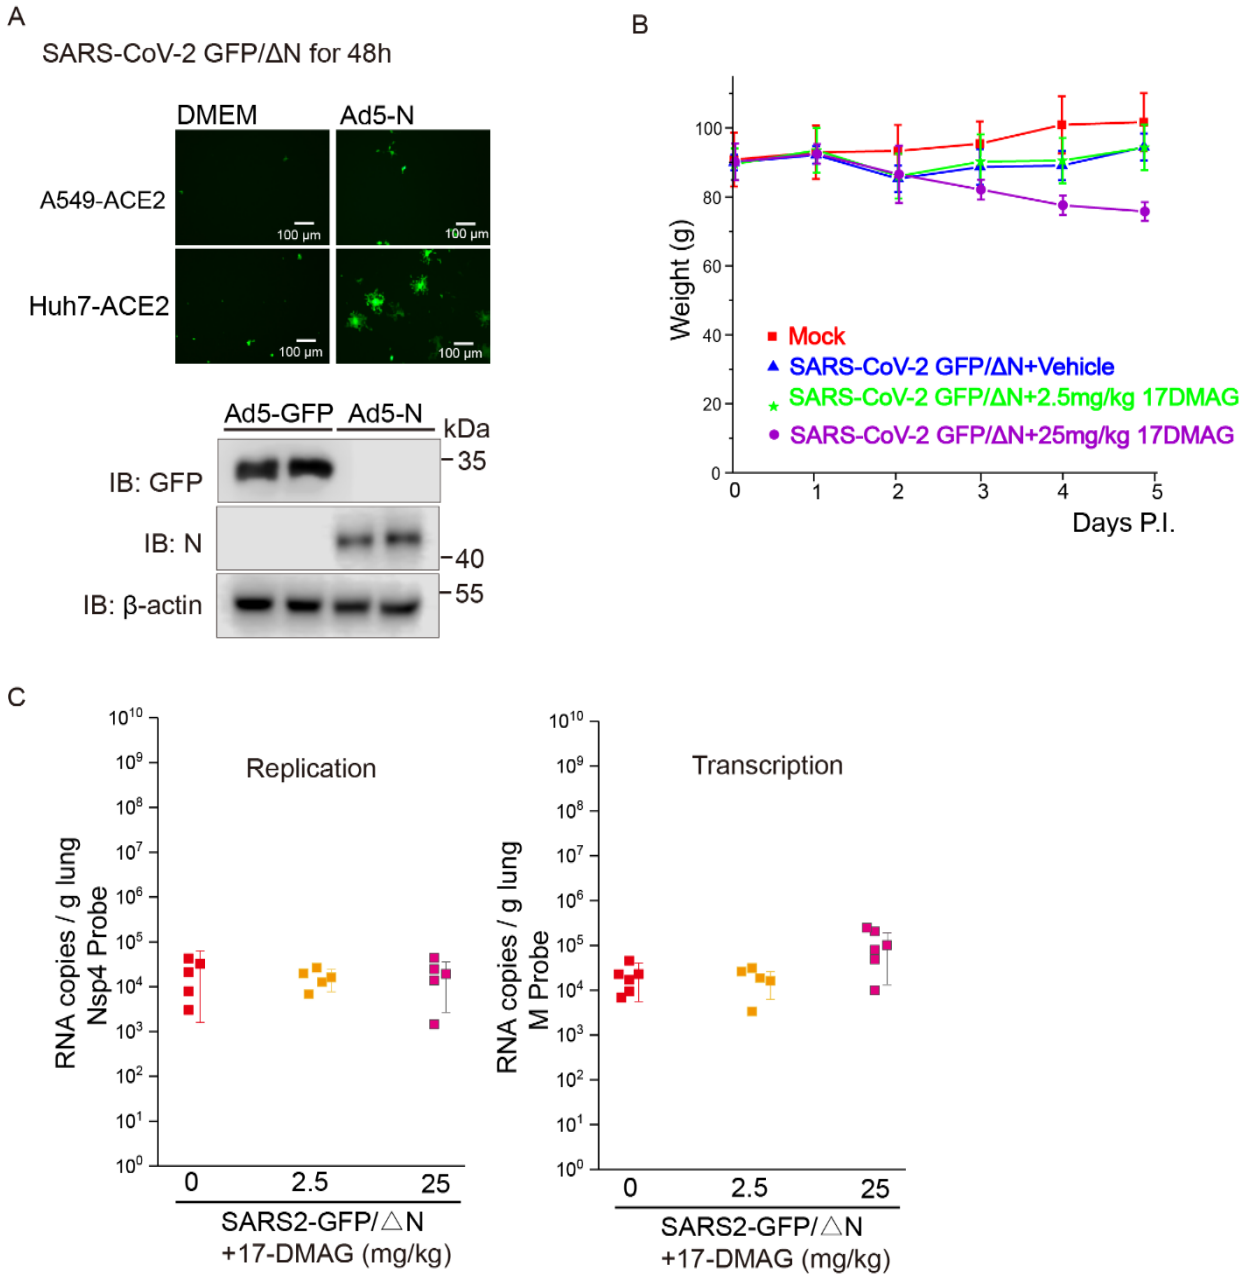

Supplement: mmc3.pdf [file mmc3.pdf]
