# Supplementary material
Source: PubMed Central journal article supplement (PMC10172899)
Supplement: mmc1.pdf [file mmc1.pdf]

Table S1. Primers used in plasmid construction.

| SARS-CoV-2 Protein             | Clone nt    | Primers (5'-3') for cloning into pRK5-Myc                                                                               |
|--------------------------------|-------------|-------------------------------------------------------------------------------------------------------------------------|
| <b>Non-structural proteins</b> |             |                                                                                                                         |
| Nsp1                           | 266-805     | FP: TGCACCTCGGTTCTATCGATTGAATTCGCCACCATGGAGAGCCTTGTCCTT<br>RP: TGATCAGCTTCTGCTCGTCGACTCTAGACCCTCCGTTAAGCTCACGCAT        |
| Nsp2                           | 806-2719    | FP: TGCACCTCGGTTCTATCGATTGAATTCGCCACCATGGCATACTCGCTAT<br>RP: TGATCAGCTTCTGCTCGTCGACTCTAGAACCCTTTGAGTGTGAAGGT            |
| ADRP (Nsp3)                    | 3353-3763   | FP: TGCACCTCGGTTCTATCGATTGAATTCGCCACCATGGGTTATTTAAAACCT<br>RP: TGATCAGCTTCTGCTCGTCGACTCTAGATACACAACTCTTAAAGAATGT        |
| PLpro (Nsp3)                   | 4955-6946   | FP: TGCACCTCGGTTCTATCGATTGAATTCGCCACCATGGAAGTGAGGACTAT<br>RP: TGATCAGCTTCTGCTCGTCGACTCTAGATATCAGTTTAGAAAAATTAGGT        |
| Nsp4                           | 8555-10054  | FP: TGCACCTCGGTTCTATCGATTGAATTCGCCACCATGAAAATTGTTAATAATT<br>RP: TGATCAGCTTCTGCTCGTCGACTCTAGACTGCAAAACAGCTGAGGT          |
| Nsp5                           | 10055-10972 | FP: TGCACCTCGGTTCTATCGATTGAATTCGCCACCATGAGTGGTTTTAGAAAAAT<br>RP: TGATCAGCTTCTGCTCGTCGACTCTAGATTGGAAAGTAACACCTGAGCATT    |
| Nsp6                           | 10973-11842 | FP: TGCACCTCGGTTCTATCGATTGAATTCGCCACCATGAGTGCAGTGAAAAGAACAAT<br>RP: TGATCAGCTTCTGCTCGTCGACTCTAGACTGTACAGTGGCTACTTTGAT   |
| Nsp7                           | 11843-12088 | FP: TGCACCTCGGTTCTATCGATTGAATTCGCCACCATGTCTAAAATGTCAGAT<br>RP: TGATCAGCTTCTGCTCGTCGACTCTAGATTGTAAGGTTGCCCTGTTGT         |
| Nsp8                           | 12089-12685 | FP: TGCACCTCGGTTCTATCGATTGAATTCGCCACCATGGCTATAGCCTCAGAGT<br>RP: TGATCAGCTTCTGCTCGTCGACTCTAGACTGTAATTTGACAGCAGAAT        |
| Nsp9                           | 12686-13024 | FP: TGCACCTCGGTTCTATCGATTGAATTCGCCACCATGAATAATGAGCTTAGT<br>RP: TGATCAGCTTCTGCTCGTCGACTCTAGATTGTAGACGTACTGTGGCAGCT       |
| Nsp10                          | 13025-13441 | FP: TGCACCTCGGTTCTATCGATTGAATTCGCCACCATGGCTGGTAATGCAACAGAAGT<br>RP: TGATCAGCTTCTGCTCGTCGACTCTAGACTGAAGCATGGGTTCCGCGGAGT |
| Nsp12                          | 13442-16236 | FP: TGCACCTCGGTTCTATCGATTGAATTCGCCACCATGCGGGTTTGCGGTGT<br>RP: TGATCAGCTTCTGCTCGTCGACTCTAGACTGTAAGACTGTATGCGGTGT         |
| Nsp13                          | 16237-18039 | FP: TGCACCTCGGTTCTATCGATTGAATTCGCCACCATGGCTGTTGGGGCTTGT<br>RP: TGATCAGCTTCTGCTCGTCGACTCTAGATTGTAAAGTTGCCACATTCCT        |
| Nsp14                          | 18040-19620 | FP: TGCACCTCGGTTCTATCGATTGAATTCGCCACCATGGCTGAAAATGTAACAGGACT<br>RP: TGATCAGCTTCTGCTCGTCGACTCTAGACTGAAGTCTTGTAAGTGTGTT   |
| Nsp15                          | 19621-20658 | FP: TGCACCTCGGTTCTATCGATTGAATTCGCCACCATGAGTTTAGAAAATGT<br>RP: TGATCAGCTTCTGCTCGTCGACTCTAGATTGTAATTTGGGTAAAATGT          |
| Nsp16                          | 20659-21555 | FP: TGCACCTCGGTTCTATCGATTGAATTCGCCACCATGTCTAGTCAAGCGT<br>RP: TGATCAGCTTCTGCTCGTCGACTCTAGATTAGTTGTTAACAAGAACAT           |
| <b>Structural proteins</b>     |             |                                                                                                                         |
| S                              | 21536-25384 | FP: cggGGTACCATGTTTGTGTTTTCTGTTTTATTGCCACT<br>RP: ccgCTCGAGTTAATGGTGATGGTGATGATGTGTGTAATGTAATTTGACT                     |
| E                              | 26245-26472 | FP: TGCACCTCGGTTCTATCGATTGAATTCGCCACCATGTAATCATTGCTT<br>RP: TGATCAGCTTCTGCTCGTCGACTCTAGAGACCAGAAGATCAGGAACCTCT          |
| M                              | 26523-27191 | FP: TGCACCTCGGTTCTATCGATTGAATTCGCCACCATGGCAGATTCCAACGGT                                                                 |

|                    |              |                                                                                                                                                                               |
|--------------------|--------------|-------------------------------------------------------------------------------------------------------------------------------------------------------------------------------|
| N                  | 28274-29533  | RP: TGATCAGCTTCTGCTCGTCTGACTCTAGACTGTACAAGCAAAGCAATAT<br>FP: TGCACCTCGGTTCTATCGATTGAATTCGCCACCATGTCTGATAATGGACCCCAA<br>RP: TGATCAGCTTCTGCTCGTCTGACTCTAGAGGCCTGAGTTGAGTCAGCACT |
| Accessory proteins |              |                                                                                                                                                                               |
| Orf3               | 25393- 26220 | FP: TGCACCTCGGTTCTATCGATTGAATTCGCCACCATGGATTTGTTTATGAGAAT<br>RP: TGATCAGCTTCTGCTCGTCTGACTCTAGACAAAGGCACGCTAGTAGTCG                                                            |
| Orf6               | 27202-27387  | FP: TGCACCTCGGTTCTATCGATTGAATTCGCCACCATGTTTCATCTCGTT<br>RP: TGATCAGCTTCTGCTCGTCTGACTCTAGAATCAATCTCCATT                                                                        |
| Orf7a              | 27394-27759  | FP: TGCACCTCGGTTCTATCGATTGAATTCGCCACCATGAAAATTATTCTTTTCTT<br>RP: TGATCAGCTTCTGCTCGTCTGACTCTAGATTCTGTCTTTCTTTTGAGTGT                                                           |
| Orf7b              | 27756-27887  | FP: TGCACCTCGGTTCTATCGATTGAATTCGCCACCATGATTGAACTTTCATTAATT<br>RP: TGATCAGCTTCTGCTCGTCTGACTCTAGAGGCGTGACAAGTTTCATTAT                                                           |
| Orf8               | 27894-28259  | FP: TGCACCTCGGTTCTATCGATTGAATTCGCCACCATGAAATTTCTGTTTTCTT<br>RP: TGATCAGCTTCTGCTCGTCTGACTCTAGAGATGAAATCTAAAACAACAC                                                             |
| Orf9b              | 28734-28955  | FP: TGCACCTCGGTTCTATCGATTGAATTCGCCACCATGGACCCCAAATCAGCG<br>RP: TGATCAGCTTCTGCTCGTCTGACTCTAGATTTTACCGTACCACCACGAAT                                                             |

FR: Forward Primer; RP: Reverse Primer; nt: nucleotides;

Other primer of N, M proteins.

| SARS-CoV-2 Protein | Clone nt | Primers (5'-3') for cloning into pRK5-Myc                                                                                                                                                                    |
|--------------------|----------|--------------------------------------------------------------------------------------------------------------------------------------------------------------------------------------------------------------|
| Deletion mutants   |          |                                                                                                                                                                                                              |
| N1-174             | 1-174    | FP: TGCACCTCGGTTCTATCGATTGAATTCGCCACCATGTCTGATAATGGACCCCAA<br>RP: TGATCAGCTTCTGCTCGTCTGACTCTCCCTTCTGCGTAGAAGCCTTT                                                                                            |
| N175-246           | 175-246  | FP: TGCACCTCGGTTCTATCGATTGAATTCGCCACCATGAGCAGAGGCGGCAGTCAAGCC<br>RP: TGATCAGCTTCTGCTCGTCTGACTCTAGAAGTGACAGTTTGGCCTTGTTG                                                                                      |
| N247-419           | 247-419  | FP: TGCACCTCGGTTCTATCGATTGAATTCGCCACCATGAAGAAATCTGCTGCTGAGGC<br>RP: TGATCAGCTTCTGCTCGTCTGACTCTAGAGGCCTGAGTTGAGTCAGCACT                                                                                       |
| M1-100             | 1-100    | FP: TGCACCTCGGTTCTATCGATTGAATTCGCCACCATGGCAGATTCCAACGGT<br>RP: TGATCAGCTTCTGCTCGTCTGACTCTTCTGAAAGAAGCAATGAAGTAGC                                                                                             |
| M101-222           | 101-222  | FP: TGCACCTCGGTTCTATCGATTGAATTCGCCACCATGTTTGCGCGTACGCGTTCCATG<br>RP: TGATCAGCTTCTGCTCGTCTGACTCTAGACTGTACAAGCAAAGCAATAT                                                                                       |
| Fluorescent tags   |          |                                                                                                                                                                                                              |
| N-GFP              |          | FP1: TGCACCTCGGTTCTATCGATTGAATTCGCCACCATGTCTGATAATGGACCCCAA<br>RP2: gtcacTGACCCGGCCTGAGTTGAGTCAGCACTGC<br>FP3: CAGGCCGGGTCAGtgagcaagggcgaggagctggt<br>RP4: GATCAGCTTCTGCTCGTCTGACTCTAGATTActgtacagctcgtccatg |
| M-mcherry          |          | FP1: TGCACCTCGGTTCTATCGATTGAATTCGCCACCATGGCAGATTCCAACGGT<br>RP2: gtcacTGACCCCTGTACAAGCAAAGCAATATTGT<br>FP3: GTACAGGGGTCAGtgagcaagggcgaggaggataa<br>RP4: TCAGCTTCTGCTCGTCTGACTCTAGATTActgtacagctcgtccatgc     |
| No tags            |          |                                                                                                                                                                                                              |

|   |                                                                                                                    |
|---|--------------------------------------------------------------------------------------------------------------------|
| N | FP: TGCACCTCGGTTCTATCGATTGAATTCGCCACCATGTCTGATAATGGACCCCAA<br>RP: GATCAGCTTCTGCTCGTCTGACTCTTTAGGCCTGAGTTGAGTCAGCAC |
| M | FP: TGCACCTCGGTTCTATCGATTGAATTCGCCACCATGGCAGATTCCAACGGT<br>RP: TGATCAGCTTCTGCTCGTCTGACTCTTTACTGTACAAGCAAAGCAATAT   |
| E | FP: TGCACCTCGGTTCTATCGATTGAATTCGCCACCATGTACTCATTGCTT<br>RP: TGATCAGCTTCTGCTCGTCTGACTCTTTAGACCAGAAGATCAGGAACTCT     |

FR: Forward Primer; RP: Reverse Primer; nt: nucleotides;

Primer for lentivirus packaging.

| Clone nt     | Primers (5'-3') for cloning into pLenti-EF1 $\alpha$ -BSD                                                                                                                     |
|--------------|-------------------------------------------------------------------------------------------------------------------------------------------------------------------------------|
| Protein      |                                                                                                                                                                               |
| ACE2-BSD-F   | FP: TTTCAGGTGTCGTGAcGTACGggatccGCCACCatgtcaagctcttctggctcctt<br>RP: CTCTGCCCTCTCCACTGCCgttacaggatccaaaggaggctgaacatcatcagtgt                                                  |
| M-Flag-BSD-R | FP1: TTTCAGGTGTCGTGAcGTACGggatccATGGCAGATTCCAACGGTACTAT<br>RP1: ATCGTCGTCATCCTTGTAACTCTAGACTGTACAAGCAAAGCAATATTGT<br>RP2: CCTCTCCACTGCCgttacaggatccCTTATCGTCGTCATCCTTGTAACTCT |

Other primer of N, M proteins.

| SARS-CoV-2 Clone nt | Primers (5'-3') for cloning into PB-CMV-MCS-EF1 $\alpha$ -GreenPuro PiggyBac Protein                                        |
|---------------------|-----------------------------------------------------------------------------------------------------------------------------|
| No tags             |                                                                                                                             |
| N                   | FP: ATAGAAGATTCTAGAGCTAGCGAATTCGCCACCATGTCTGATAATGGACCCCAA<br>RP: TGAAGGAGAGATGCGAGCCCCTCGAAGCTTTTAGGCCTGAGTTGAGTCAGCACT    |
| MYC tags            |                                                                                                                             |
| N                   | FP1: ATAGAAGATTCTAGAGCTAGCGAATTCGCCACCATGTCTGATAATGGACCCCAA<br>RP2: TGAAGGAGAGATGCGAGCCCCTCGAAGCTTTTACAGCAGGTCCTCCTCGCTGAT  |
| M                   | FP1: CATAGAAGATTCTAGAGCTAGCGAATTCGCCACCATGGCAGATTCCAACGGTACT<br>RP2: TGAAGGAGAGATGCGAGCCCCTCGAAGCTTTTACAGCAGGTCCTCCTCGCTGAT |

Oligonucleotides used for RT-qPCR

| Gene                 |                                                                 |
|----------------------|-----------------------------------------------------------------|
| Hamster_Gapdh        | FP: GCATGGCCTCCGTGTCC<br>RP: TGTCATCATACTTGGCAGGTTTCT           |
| Hamster_TNF $\alpha$ | FP1: TGAGCCATCGTGCCAATG<br>RP2: AGCCCGTCTGCTGGTATCAC            |
| Hamster_IL6          | FP1: GGACAATGACTATGTGTTGTTAGAA<br>RP2: AGGCAAATTTCCAATTGTATCCAG |
| Hamster_IL1b         | FP1: TGGACCTTCCAGGATGAGGACA<br>RP2: GTTCATCTCGGAGCCTGTAGTG      |
| Human NLRP3          | FP1: ATTCGGAGATTGTGGTTGGG<br>RP2: AGGGCGTTGTCACCTCAGGTC         |

---

|                 |                                                                     |
|-----------------|---------------------------------------------------------------------|
| Human caspase-1 | FP1: CTCAGGCTCAGAAGGGAATGTC<br>RP2: TGTGCGGCTTGACTTGTC              |
| Human TNFa      | FP1: CCAGACCAAGGTCAACCTCC<br>RP2: CAGACTCGGCAAAGTCGAGA              |
| Human IL-6      | FP1: AGGAGACTTGCCTGGTGAAA<br>RP2: CAGGGGTGGTTATTGCATCT              |
| Human IL-8      | FP1: TTGGCAGCCTTCCTGATTC<br>RP2: CTTTAGCACTCCTTGGCAAAAC             |
| Human IL-10     | FP1: GATTTAATAAGCTCCAAGACCAAGGT<br>RP2: CTTCTATGCAGTTGATGAAGATGTCAA |
| Human Gapdh     | FP1: GGAGTCAACGGATTTGGT<br>RP2: TGATGGGATTTCCATTG                   |
| SARS-CoV-2-M    | FP1: GCCACTCCATGGCACTATT<br>RP2: CCTAGATGGTGTCCAGCAATAC             |
| SARS-CoV-2-N    | FP1: GTGATGCTGCTCTTGCTTTG<br>RP2: GTGACAGTTTGGCCTTGTTG              |
| FBXO10          | FP1: CTGTGGCGCATGATCTTAGC<br>RP2: TGGATGCAAGGTAATGCTGCT             |
| RCBTB2          | FP1: CAAGCCAGTACAGGCTACTCT<br>RP2: CCGAGGTTCAATGGTGCTCTG            |

---

FR: Forward Primer; RP: Reverse Primer; nt: nucleotides;
